# Supplementary material for: High physiological thermal triplex stability optimization of twisted intercalating nucleic acids (TINA)
Source: Royal Society of Chemistry journal article supplement (doi:10.1039/b808564a), 2008-01-01
Supplement: b808564a.pdf [file b808564a.pdf]

## High Physiological Thermal Triplex Stability

### -Optimization of Twisted Intercalating Nucleic Acids (TINA)

Niels Bomholt,<sup>1</sup> Amany M. A. Osman<sup>1</sup> and Erik B. Pedersen\*<sup>1</sup>

<sup>1</sup> Nucleic Acid Center, Department of Physics and Chemistry, University of Southern Denmark, Campusvej 55, DK-5230 Odense M (Denmark)

#### Electronic Supplementary Information

##### Melting curves

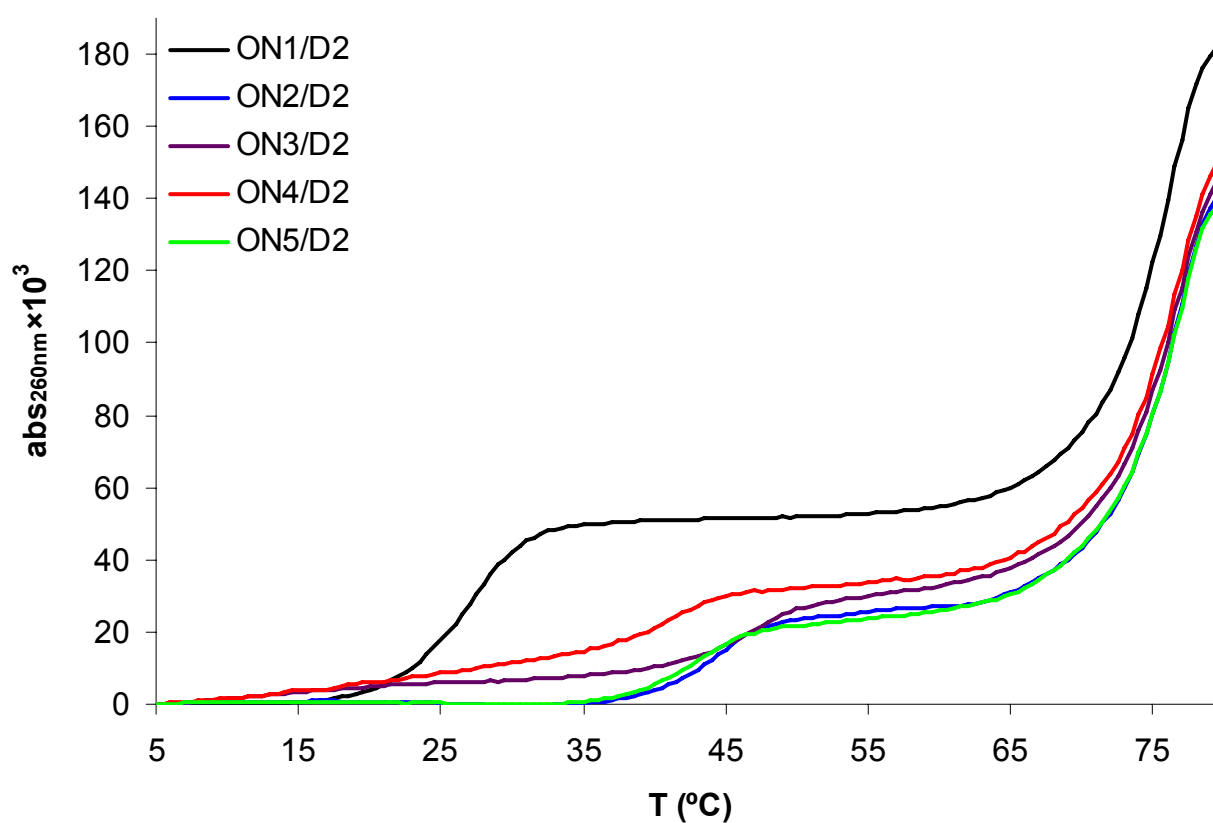

Figure 1. Melting curves of thermal denaturation experiments of triplexes (ON1-ON5/D2) recorded in 20 mM sodium cacodylate, 100 mM NaCl, 10 mM MgCl<sub>2</sub>, pH 6.0, at 260nm versus temperature, with a heating of 1.0 °C/min.

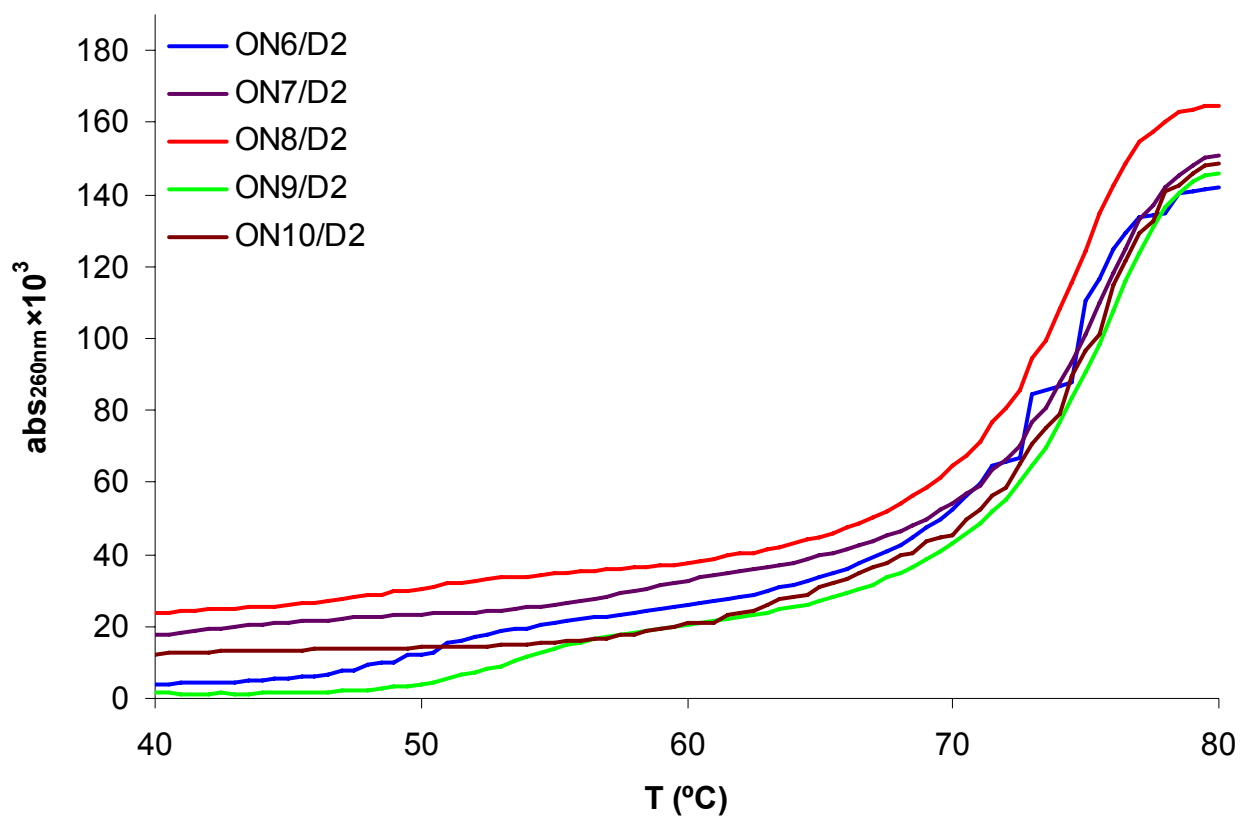

Figure 2. Melting curves of thermal denaturation experiments of triplexes (**ON6-ON10/D2**) recorded in 20 mM sodium cacodylate, 100 mM NaCl, 10 mM MgCl<sub>2</sub>, pH 6.0, at 260nm versus temperature, with a heating of 1.0 °C/min.

### First derivative plots

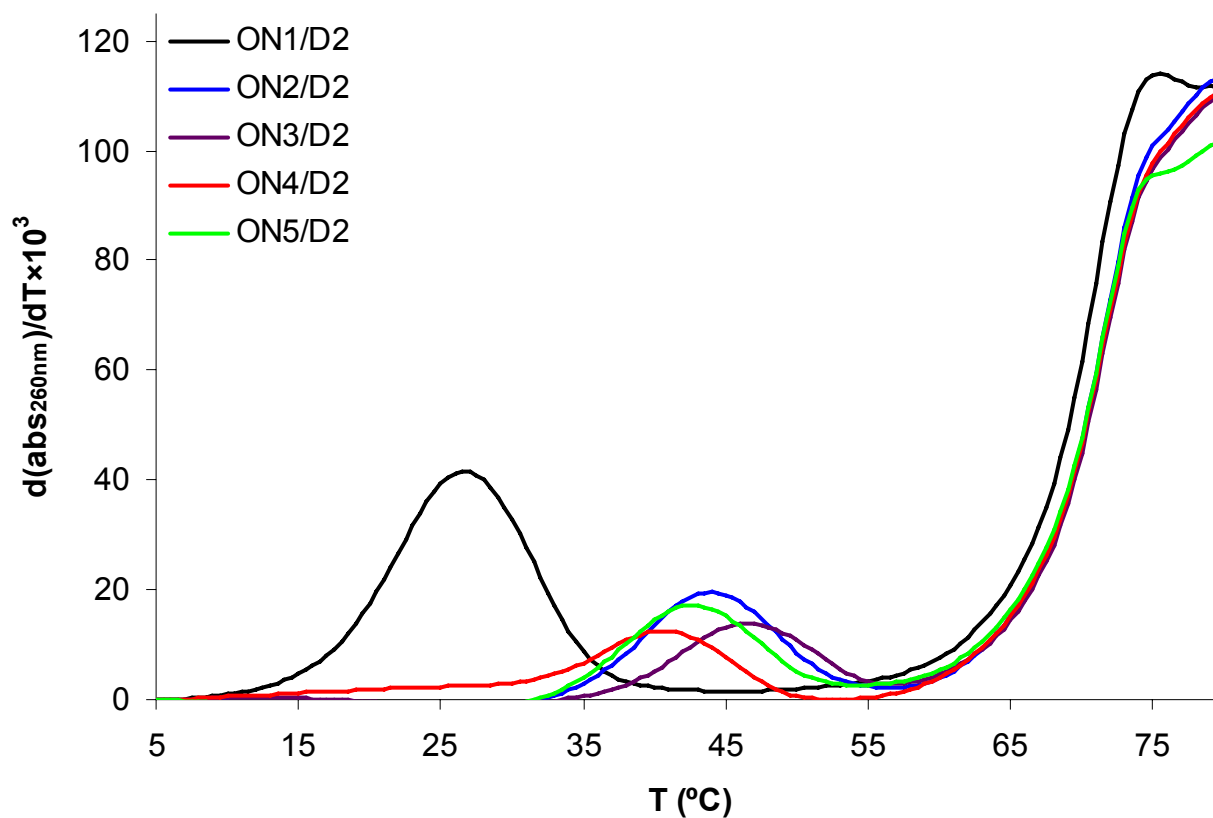

Figure 3. First derivate plots of thermal denaturation experiments of triplexes (**ON1-ON5/D2**) recorded in 20 mM sodium cacodylate, 100 mM NaCl, 10 mM MgCl<sub>2</sub>, pH 6.0, at 260nm versus temperature, with a heating of 1.0 °C/min.

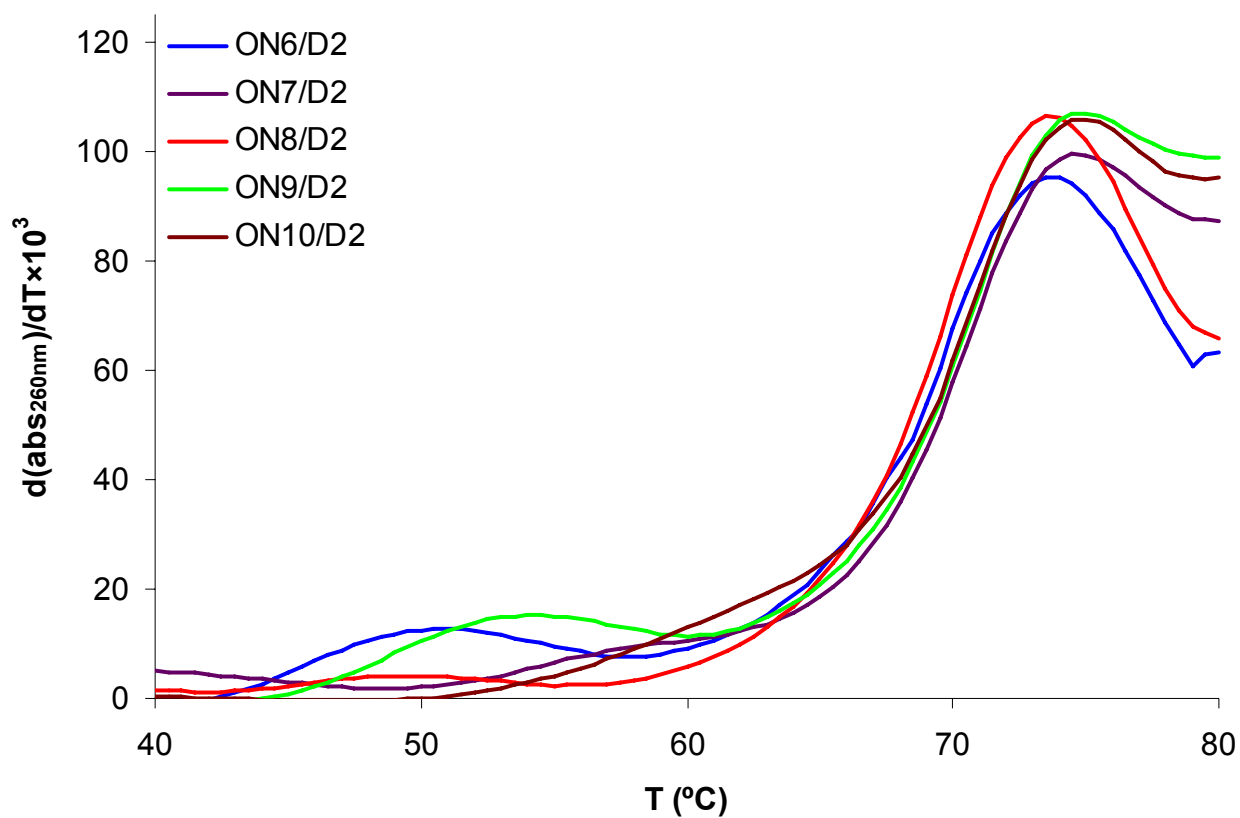

Figure 4. First derivate plots of thermal denaturation experiments of triplexes (**ON6-ON10/D2**) recorded in 20 mM sodium cacodylate, 100 mM NaCl, 10 mM MgCl<sub>2</sub>, pH 6.0, at 260nm versus temperature, with a heating of 1.0 °C/min.

## HPLC ion-exchange chromatography

D-7000 HSM: Ionchromatografi Series: 3652 Report: original System: Sys 1

### D-7000 HPLC System Manager Report

Analyzed: 25-04-07 05:07 Reported: 27-04-07 09:43  
Processed: 25-04-07 05:52  
Data Path: C:\WIN32APP\HSM\Ionchromatografi\DATA\3652\  
Processing Method: DNAPac\_40-700mM\_pH8\_45min  
System(acquisition): Sys 1 Series:3652  
Application: Ionchromatografi Vial Number: 13  
Sample Name: BOM-T01 Vial Type: UNK  
Injection from this vial: 1 of 1 Volume: 30,0 ul  
Sample Description:

Chrom Type: HPLC Channel : 1

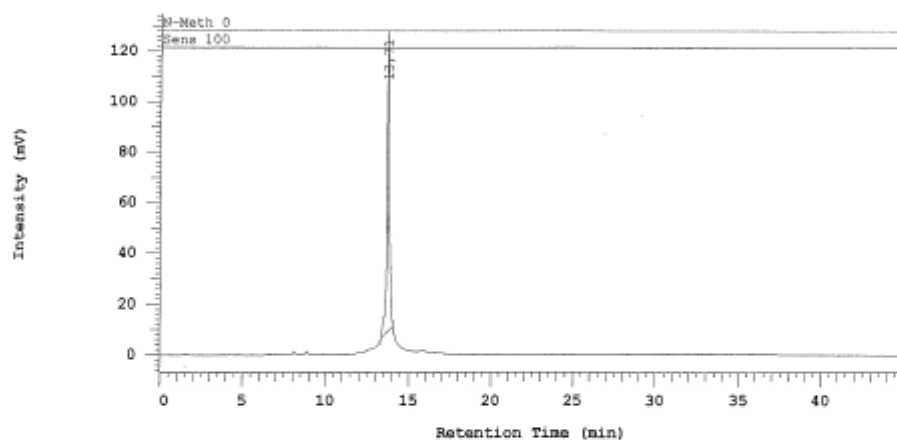

Acquisition Method: DNAPac\_40-700mM\_pH8\_45min  
Column Type: Developed by: Suzy Lena  
Pump A Type: L-7100  
Solvent A: H2O Solvent B: 0.2M NaOH  
Solvent C: 0.25M Tris-Cl Solvent D: 2M NaCl  
Method Description: Metode til ionchromatografi, kolonne DNAPac-100

Chrom Type: HPLC Channel : 1

Peak Quantitation: AREA  
Calculation Method: AREA%

| No. | RT    | Area    | Conc 1  |
|-----|-------|---------|---------|
| 1   | 13,71 | 1210880 | 100,000 |
|     |       | 1210880 | 100,000 |

Peak rejection level: 20000

Figure 5. HPLC ion-exchange chromatography, purity determination of ON3

D-7000 HSM: Ionchromatografi Series: 3652 Report: original System: Sys 1

### D-7000 HPLC System Manager Report

Analyzed: 25-04-07 03:34 Reported: 27-04-07 09:43  
Processed: 25-04-07 04:19  
Data Path: C:\WIN32APP\HSM\Ionchromatografi\DATA\3652\  
Processing Method: DNAPac\_40-700mM\_pH8\_45min  
System(acquisition): Sys 1 Series:3652  
Application: Ionchromatografi Vial Number: 11  
Sample Name: BOM-T02 Vial Type: UNK  
Injection from this vial: 1 of 1 Volume: 30,0 ul  
Sample Description:

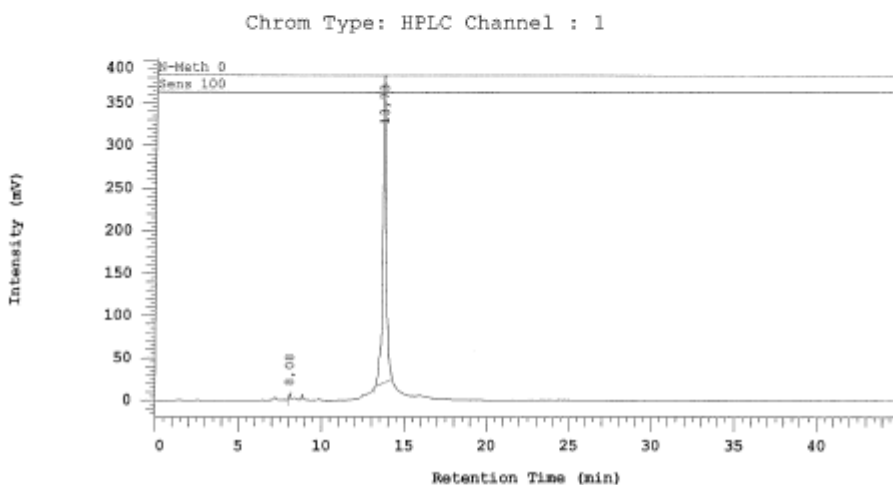

Acquisition Method: DNAPac\_40-700mM\_pH8\_45min  
Column Type: Developed by: Suzy Lena  
Pump A Type: L-7100  
Solvent A: H2O Solvent B: 0.2M NaOH  
Solvent C: 0.25M Tris-Cl Solvent D: 2M NaCl  
Method Description: Metode til ionchromatografi, kolonne DNAPac-100

Chrom Type: HPLC Channel : 1

Peak Quantitation: AREA  
Calculation Method: AREA%

| No. | RT    | Area    | Conc 1  |
|-----|-------|---------|---------|
| 1   | 8,08  | 23499   | 0,494   |
| 2   | 13,73 | 4730406 | 99,506  |
|     |       |         | 100,000 |

Peak rejection level: 20000

Figure 6. HPLC ion-exchange chromatography, purity determination of ON4

D-7000 HSM: Ionchromatografi Series: 3749 Report: original System: Sys 1

### D-7000 HPLC System Manager Report

Analyzed: 14-06-07 20:36 Reported: 15-06-07 10:39  
Processed: 14-06-07 21:22  
Data Path: C:\WIN32APP\HSM\Ionchromatografi\DATA\3749\  
Processing Method: DNAPac\_40-700mM\_pH8\_45min  
System(acquisition): Sys 1 Series:3749  
Application: Ionchromatografi Vial Number: 21  
Sample Name: AAO-011 Vial Type: UNK  
Injection from this vial: 1 of 1 Volume: 30,0 ul  
Sample Description:

Chrom Type: HPLC Channel : 1

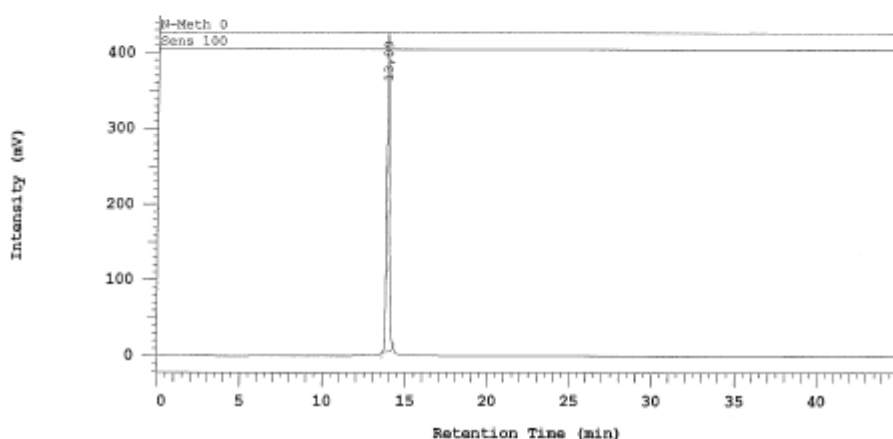

Acquisition Method: DNAPac\_40-700mM\_pH8\_45min  
Column Type: Developed by: Suzy Lena  
Pump A Type: L-7100  
Solvent A: H2O Solvent B: 0.2M NaOH  
Solvent C: 0.25M Tris-Cl Solvent D: 2M NaCl  
Method Description: Metode til ionchromatografi, kolonne DNAPac-100

Chrom Type: HPLC Channel : 1

Peak Quantitation: AREA  
Calculation Method: AREA%

| No. | RT    | Area    | Conc 1  |
|-----|-------|---------|---------|
| 1   | 13,89 | 4384217 | 100,000 |
|     |       | 4384217 | 100,000 |

Peak rejection level: 20000

Figure 7. HPLC ion-exchange chromatography, purity determination of ON5

D-7000 HSM: Ionchromatografi Series: 3743 Report: original System: Sys 1

### D-7000 HPLC System Manager Report

Analyzed: 12-06-07 15:43 Reported: 13-06-07 11:10  
Processed: 12-06-07 16:29  
Data Path: C:\WIN32APP\HSM\Ionchromatografi\DATA\3743\  
Processing Method: DNAPac\_40-700mM\_pH8\_45min  
System(acquisition): Sys 1 Series:3743  
Application: Ionchromatografi Vial Number: 28  
Sample Name: 07.06.07 gl. 5 *Bcm-705* Vial Type: UNK  
Injection from this vial: 1 of 1 Volume: 30,0 ul  
Sample Description:

Chrom Type: HPLC Channel : 1

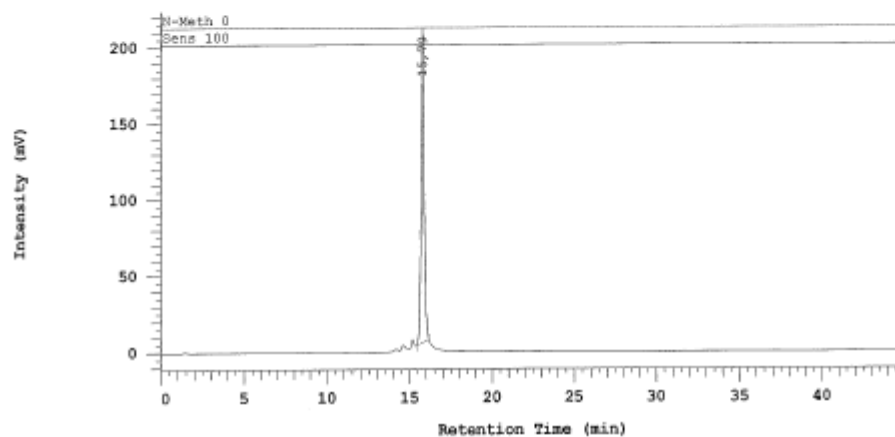

Acquisition Method: DNAPac\_40-700mM\_pH8\_45min  
Column Type: Developed by: Suzy Lena  
Pump A Type: L-7100  
Solvent A: H2O Solvent B: 0.2M NaOH  
Solvent C: 0.25M Tris-Cl Solvent D: 2M NaCl  
Method Description: Metode til ionchromatografi, kolonne DNAPac-100

Chrom Type: HPLC Channel : 1

Peak Quantitation: AREA  
Calculation Method: AREA%

| No. | RT    | Area    | Conc 1  |
|-----|-------|---------|---------|
| 1   | 15,79 | 2467618 | 100,000 |
|     |       | 2467618 | 100,000 |

Peak rejection level: 20000

Figure 8. HPLC ion-exchange chromatography, purity determination of ON7



D-7000 HSM: Ionchromatografi Series: 4282 Report: original System: Sys 1

### D-7000 HPLC System Manager Report

Analyzed: 24-01-08 20:57 Reported: 25-01-08 08:26  
Processed: 24-01-08 21:37  
Data Path: C:\WIN32APP\HSM\Ionchromatografi\DATA\4282\  
Processing Method: DNAPac\_pH8\_700-800mM\_40min  
System(acquisition): Sys 1 Series:4282  
Application: Ionchromatografi Vial Number: 12  
Sample Name: BOM-T08 33.07- Vial Type: UNK  
Injection from this vial: 1 of 1 Volume: 30,0 ul  
Sample Description:

Chrom Type: HPLC Channel : 1

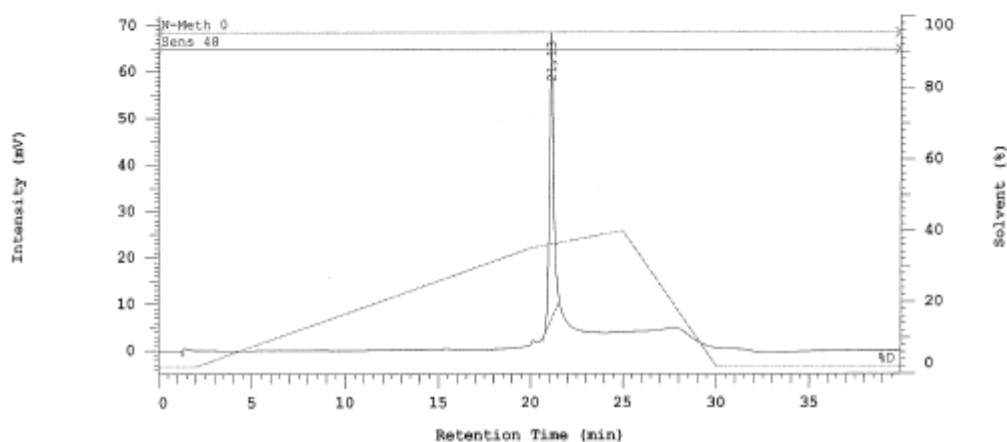

Acquisition Method: DNAPac\_pH8\_700-800mM\_40min  
Column Type: Developed by: Suzy Lena  
Pump A Type: L-7100  
Solvent A: H2O Solvent B: 0.05M NaOH  
Solvent C: 0.25M Tris-Cl + 0.001M EDTA Solvent D: 2M NaCl  
Method Description: Metode til ionchromatografi, kolonne DNAPac-100

Chrom Type: HPLC Channel : 1

Peak Quantitation: AREA  
Calculation Method: AREA%

| No. | RT    | Area   | Conc 1  |
|-----|-------|--------|---------|
| 1   | 21,13 | 941508 | 100,000 |
|     |       | 941508 | 100,000 |

Peak rejection level: 20000

Figure 9. HPLC ion-exchange chromatography, purity determination of ON8

D-7000 HSM: Ionchromatografi Series: 3749 Report: original System: Sys 1

### D-7000 HPLC System Manager Report

Analyzed: 14-06-07 22:09 Reported: 15-06-07 10:39  
Processed: 14-06-07 22:55  
Data Path: C:\WIN32APP\HSM\Ionchromatografi\DATA\3749\  
Processing Method: DNAPac\_40-700mM\_pH8\_45min  
System(acquisition): Sys 1 Series:3749  
Application: Ionchromatografi Vial Number: 23  
Sample Name: AAO-014 Vial Type: UNK  
Injection from this vial: 1 of 1 Volume: 30,0 ul  
Sample Description:

Chrom Type: HPLC Channel : 1

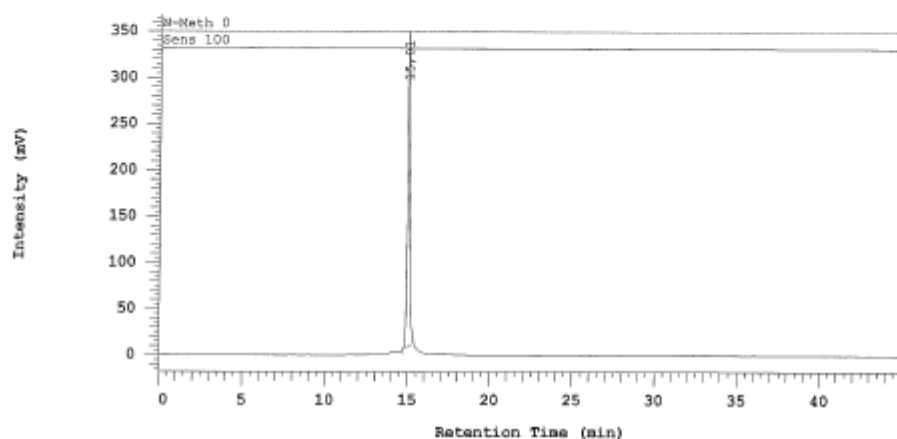

Acquisition Method: DNAPac\_40-700mM\_pH8\_45min  
Column Type: Developed by: Suzy Lena  
Pump A Type: L-7100  
Solvent A: H2O Solvent B: 0.2M NaOH  
Solvent C: 0.25M Tris-Cl Solvent D: 2M NaCl  
Method Description: Metode til ionchromatografi, kolonne DNAPac-100

Chrom Type: HPLC Channel : 1

Peak Quantitation: AREA  
Calculation Method: AREA%

| No. | RT    | Area    | Conc 1  |
|-----|-------|---------|---------|
| 1   | 15,01 | 3305150 | 100,000 |
|     |       | 3305150 | 100,000 |

Peak rejection level: 20000

Figure 10. HPLC ion-exchange chromatography, purity determination of ON9

D-7000 HSM: Ionchromatografi Series: 4276 Report: original System: Sys 1

### D-7000 HPLC System Manager Report

Analyzed: 24-01-08 00:11 Reported: 24-01-08 10:21  
Processed: 24-01-08 00:51  
Data Path: C:\WIN32APP\HSM\Ionchromatografi\DATA\4276\  
Processing Method: DNAPac\_pH8\_700-800mM\_40min  
System(acquisition): Sys 1 Series:4276  
Application: Ionchromatografi Vial Number: 15  
Sample Name: BOM T09 1 Vial Type: UNK  
Injection from this vial: 1 of 1 Volume: 20,0 ul  
Sample Description:

Chrom Type: HPLC Channel : 1

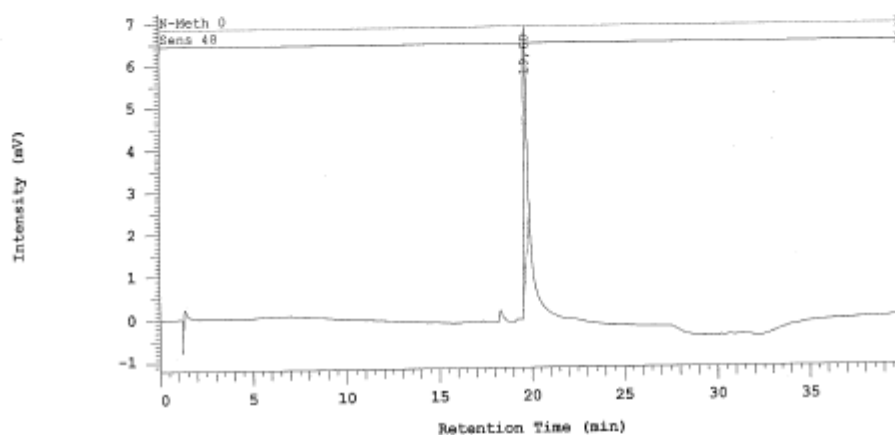

Acquisition Method: DNAPac\_pH8\_700-800mM\_40min  
Column Type: Developed by: Suzy Lena  
Pump A Type: L-7100  
Solvent A: H2O Solvent B: 0.05M NaOH  
Solvent C: 0.25M Tris-Cl + 0.001M EDTA Solvent D: 2M NaCl  
Method Description: Metode til ionchromatografi, kolonne DNAPac-100

Chrom Type: HPLC Channel : 1

Peak Quantitation: AREA  
Calculation Method: AREA%

| No. | RT    | Area  | Conc 1  |
|-----|-------|-------|---------|
| 1   | 19,68 | 59427 | 100,000 |
|     |       | 59427 | 100,000 |

Peak rejection level: 20000

Figure 11. HPLC ion-exchange chromatography, purity determination of ON10
